CASE REPORTS

# Control of Succinylcholine-induced Myotonia by *d*-Tubocurarine

ANIS BARAKA, M.D., CHAWKI HADDAD, M.D., ADEL AFIFI, M.D.,  
MAURICE BAROODY, M.D.

Succinylcholine can precipitate generalized tonic contraction of skeletal muscles in myotonic patients.<sup>1,2</sup> Persistent generalized rigidity, if uncontrolled, can result in potentially lethal complications, such as difficulty in ventilating the patient<sup>3</sup> and malignant hyperpyrexia.<sup>4,5</sup>

Inhalation of halothane has failed to control myotonia following the injection of succinylcholine.<sup>6</sup> Halothane does not modify the neuromuscular effects of succinylcholine.<sup>7</sup> It may even increase muscle contractility by a direct positive inotropic effect.<sup>7,8</sup> It has also been considered unwise to give the patient an anti-depolarizing muscle relaxant.<sup>1</sup> The following report, however, indicates that *d*-tubocurarine can be used safely to control succinylcholine-induced myotonia, thus helping to terminate this life-threatening complication.

## REPORT OF A CASE

The patient was a healthy-looking 43-year-old woman. The chest and heart were clinically normal. Arterial blood pressure was 120/80 mm Hg. The patient had a history of hypothyroidism, for which she was receiving thyroid medication. She was scheduled for anteroposterior colporrhaphy.

Premedication consisted of meperidine, 100 mg, and atropine, 0.6 mg, injected intramuscularly 60 minutes before surgery. Infusion of lactated Ringer's solution via a venous cannula was started. Anesthesia was induced with 350 mg thiopental. When the patient was asleep, succinylcholine, 75 mg, was injected intravenously. This was not followed by the usual fasciculations, but the patient developed, within 30 seconds, generalized tonic muscular contractions. Her fists were tightly clenched, her jaw was locked, and her whole body became extremely rigid. Intubation was impossible. However, ventilation with 100 per cent oxy-

gen was possible, using a tightly-fitting face mask. High pressure was necessary to inflate the patient's lungs and to keep her color normal.

After four minutes, there was no change in the degree of rigidity. *d*-Tubocurarine, 15 mg, was injected intravenously, and this was followed immediately by muscular relaxation. Within three minutes, it was possible to intubate the trachea with a cuffed orotracheal tube (No. 9). Anesthesia was maintained with nitrous oxide-oxygen, supplemented with 1 per cent halothane using a Boyle Mark III circuit. Halothane was discontinued after 20 minutes. The patient breathed spontaneously and respiration was assisted throughout the surgical operation, which lasted 55 minutes. The temperature, monitored by an esophageal thermometer, remained 37°C. Recovery was uneventful. No reversal of *d*-tubocurarine block was necessary.

Postoperative neurologic examination disclosed no abnormalities except that myotonia could be demonstrated by tapping the thenar eminences bilaterally.

Electromyography was done. Insertion of the needle evoked a prolonged train of spikes and positive waves, which recurred with the slightest needle movement. The same pattern was elicited by maximum effort on the part of the patient, with waxing and waning of the response in both amplitude and frequency. This EMG pattern was accompanied by an audible dive-bomber effect.

## DISCUSSION

Myotonia is characterized by hyperexcitability of skeletal muscles, which respond by repetitive firing of action potentials to either direct or indirect stimulation.<sup>9</sup> The disease is usually observed in patients with the three hereditary muscle disorders that comprise the myotonic syndrome: dystrophia myotonica, myotonia congenita, and paramyotonia<sup>10</sup>; the three are probably manifestations of a single disease. The present patient did not belong in any of the three groups, although a definite myotonic response could be elicited by electromyography. However, she had a history of

Received from the Departments of Anesthesiology and Neuroanatomy, American University of Beirut, Beirut, Lebanon.

hypothyroidism, which can contribute to a myotonia-like syndrome.<sup>10-14</sup>

Abnormal responses to succinylcholine in myotonia have been observed in animals<sup>15,16</sup> and in man.<sup>1-3,6</sup> Succinylcholine depolarizes the endplate, producing an endplate potential which is capable of firing repetitive action potentials associated with tonic contraction of skeletal muscles.<sup>17,18</sup> It is now accepted that the defect in myotonia is muscular, which may explain why mechanical myotonia elicited by direct stimulation of muscle is completely unaffected by *d*-tubocurarine.<sup>19</sup> On the other hand, myotonia indirectly elicited by nerve impulses, acetylcholine,<sup>19,20</sup> or succinylcholine<sup>17</sup> can be prevented by prior injection of small doses of *d*-tubocurarine. *d*-Tubocurarine can both prevent and control succinylcholine-induced myotonia, as was shown in the reported case. This could be expected in view of the finding that *d*-tubocurarine not only diminishes endplate depolarization induced by depolarizing agents<sup>21</sup> but also can rapidly repolarize the endplate which has been depolarized by such agents.<sup>22</sup>

*d*-Tubocurarine does not produce abnormal neuromuscular responses in myotonic patients.<sup>17</sup> It can be used safely to control succinylcholine-induced myotonia, particularly if rigidity is persistent or complicated by difficulty in ventilating the patient or hyperpyrexia, or both.

#### REFERENCES

1. Paterson IS: Generalized myotonia following suxamethonium. *Brit J Anaesth* 34:340, 1962
2. Thiel RE: The myotonic response to suxamethonium. *Brit J Anaesth* 39:815, 1967
3. Kaufman L: Anesthesia in dystrophia myotonica. *Proc Roy Soc Med* 53:183, 1960
4. Thut WH, Davenport HT: Hyperpyrexia associated with succinylcholine-induced muscle rigidity. A case report. *Canad Anaesth Soc J* 13:425, 1966
5. Ryan JF, Papper EM: Malignant fever during and following anesthesia. *ANESTHESIOLOGY* 32:196, 1970
6. Cody JR: Muscle rigidity following administration of succinylcholine. *ANESTHESIOLOGY* 29:159, 1968
7. Baraka A: Effect of halothane on tubocurarine and suxamethonium block in man. *Brit J Anaesth* 40:602, 1968
8. Sabawala PB, Dillon JP: Action of volatile anesthetics on human muscle preparation. *ANESTHESIOLOGY* 19:587, 1958
9. Landau WM: The essential mechanism in myotonia. An electromyographic study. *Neurology* 2:369, 1952
10. Maas O, Paterson AS: The identity of myotonia congenita (Thomsen's disease), dystrophia myotonica (myotonia atrophica) and paramyotonia. *Brain* 62:198, 1939
11. Lambert EH, Sayre GP: Myopathy in rabbits following thyroidectomy. *Amer J Physiol* 183:636, 1955
12. Schwartz NB, Ingold AH: Effect of thyroxine on stimulus frequency tension output relationship in neuromuscular system. *Fed Proc* 15:166, 1956
13. Waldstein SS, Bronsky D, Shrifter HB, et al.: Electromyogram in myxedema. *Arch Int Med* 101:97, 1958
14. Nickel S, Frame B: Nervous and muscular systems in myxedema. *J Chronic Dis* 14: 570, 1961
15. Jones RS, Ritchie HE: The effect of suxamethonium in a case of myotonia in the horse. *Brit J Anaesth* 37:142, 1965
16. Hall LW, Woolf N, Bradley JWP, et al.: Unusual reaction to suxamethonium chloride. *Brit Med J* 2:1305, 1966
17. Örndahl G, Stenberg K: Myotonic human musculature: Stimulation with depolarizing agents. Mechanical registration of the effects of succinylcholine, succinylmonocholine and decamethonium. *Acta Med Scand suppl* 389, 172:3, 1962
18. Petersen I, Stenberg K, Örndahl G: Myotonic human musculature: Stimulation with depolarizing agents—simultaneous mechanical and electromyographic registration. *Acta Med Scand suppl* 389, 172:31, 1962
19. Geshwind N, Simpson JA: Procaineamide in the treatment of myotonia. *Brain* 78:81, 1955
20. Brown GL, Harvey AM: Congenital myotonia in the goat. *Brain* 62:341, 1939
21. Paton WDM, Vaud DR: The margin of safety of neuromuscular transmission. *J Physiol* 191:59, 1967
22. Burns BD, Paton WDM: Depolarization of the motor endplate by decamethonium and acetylcholine. *J Physiol* 115:51, 1951
